# Supplementary material for: Type II collagen‐positive embryonic progenitors are the major contributors to spine and intervertebral disc development and repair
Source: PubMed Central journal article supplement — Stem Cells Transl Med. 2021 May 25;10(10):1419–32. doi: 10.1002/sctm.20-0424 (PMC8459639; doi:10.1002/sctm.20-0424), 2021-05-25
Supplement: SCT3-10-1419-s001.pdf [file SCT3-10-1419-s001.pdf]

## Supplementary figure 1

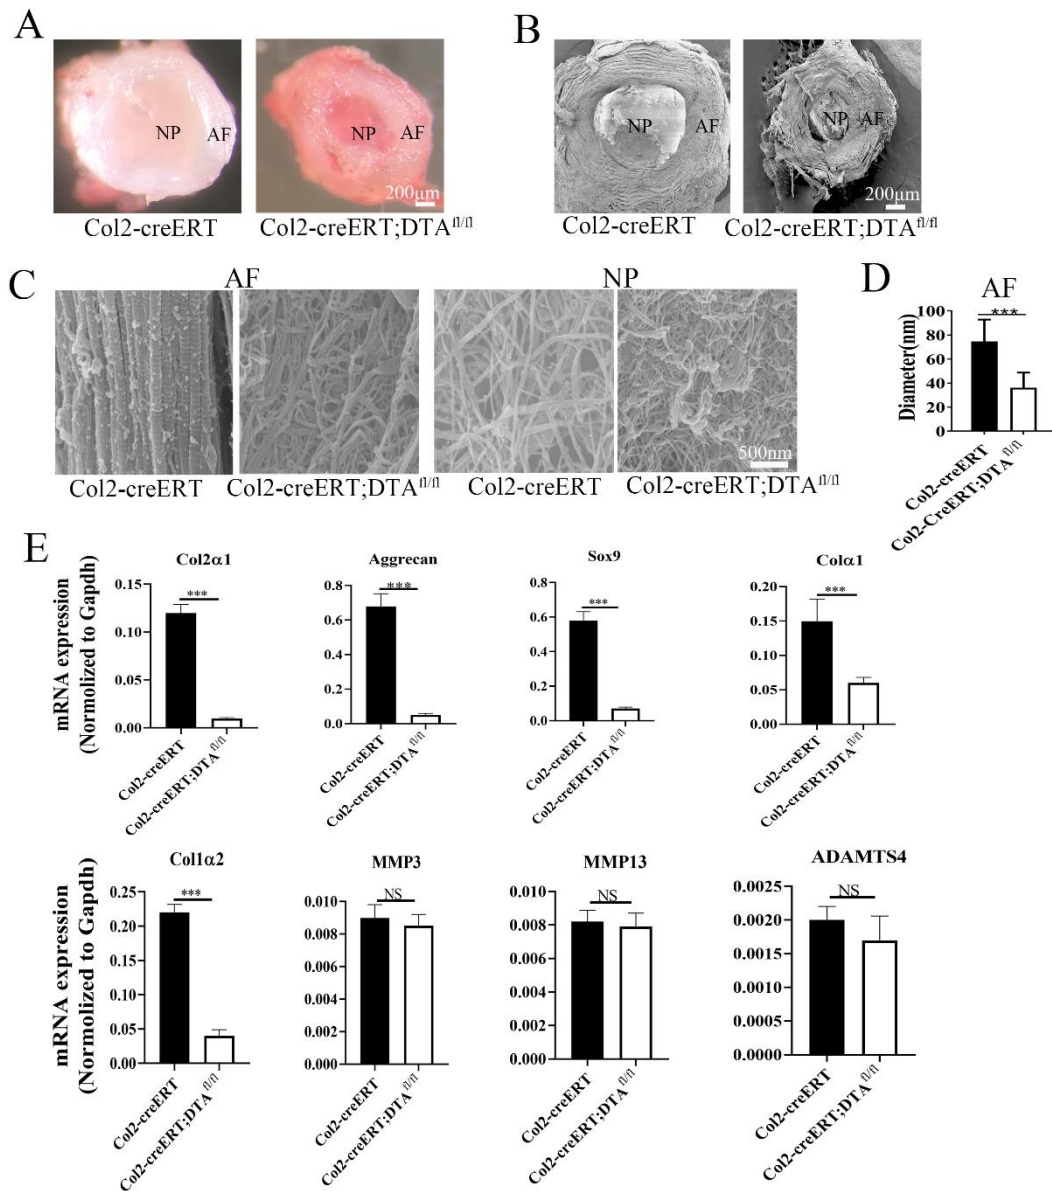

### Supplementary figure 1. Postnatal deletion of Col2+ cells impair IVD extracellular matrix formation and organization

(A) Gross appearance of IVD (with removing of superior endplate cartilage) from 4-week-old Col2-creERT and Col2-creERT;DTA<sup>fl/fl</sup> mice. Scale bar: 200µm. (B) Representative SEM images of IVD (with removing of superior endplate cartilage) from 4-week-old Col2-creERT and Col2-creERT;DTA<sup>fl/fl</sup> mice. Scale bar: 200µm. (C) High-magnification (50,000X) comparison collagen fibers in AF and NP tissue from

Col2-creERT and Col2-creERT;DTA<sup>fl/fl</sup> mice. Scale bar: 500nm. (D) The randomly calculated mean diameter of 80 collagen fibrils in AF from Col2-creERT and Col2-creERT;DTA<sup>fl/fl</sup> mice. (E) Real time RT-PCR analysis of IVD tissue from Col2-creERT and Col2-creERT;DTA<sup>fl/fl</sup> mice (mean  $\pm$  SD). (N=5, triplicates per group). Levels of Col2 $\alpha$ 1, Aggrecan, Sox9, Col1 $\alpha$ 1, Col1 $\alpha$ 2 were lower in Col2-creERT;DTA<sup>fl/fl</sup> mice. Levels of MMP3, MMP13, and ADAMTS4 were not different between Col2-creERT and Col2-creERT;DTA<sup>fl/fl</sup> mice. Statistical significance was determined by one-way ANOVA and Student's t-test. \*P < .05, \*\*P < .01, \*\*\*P < .0001. NS = not statistically significant.

Supplementary table 1: Primer

|                                 | Forward                      | Reverse                       |
|---------------------------------|------------------------------|-------------------------------|
| <i>Sox9</i>                     | 5'-TCCCCGCAACAGATCTCCTA-3'   | 5'-AGGTGGAGTAGAGCCCTGAG-3'    |
| <i>Aggrecan</i>                 | 5'-CGTTGCAGACCAGGAGCAAT-3'   | 5'-AGGAGTGACAATGCTGCTCA -3'   |
| <i>MMP3</i>                     | 5'-GGCCTGGAACAGTCTTGGC-3'    | 5'-TGTCCATCGTTCATCATCGTCA-3'  |
| <i>MMP13</i>                    | 5'-CTTTGGCTTAGAGGTGACTGG-3'  | 5'-ACTTCAGAATGGGACATATCAGG-3' |
| <i>ADAMTS4</i>                  | 5'-CACTGTGGCTCACGAAATCG-3'   | 5'-GGAACCAAAGGTCTCTTCACAGA-3' |
| <i>Col1<math>\alpha</math>1</i> | 5'-GCAACAGTCGCTTCACCTACA-3'  | 5'-CAATGTCCAAGGGAGCCACAT-3'   |
| <i>Col1<math>\alpha</math>2</i> | 5'-GGAGGGAACG-GTCCACGAT-3'   | 5'-GAGTCCGCGTATCCACAA-3'      |
| <i>Col2<math>\alpha</math>1</i> | 5'-GCAGAAATGGGCAGAGGTATAA-3' | 5'-AGTCTGGGTCTTCACAGATAATG-3' |
| <i>GAPDH</i>                    | 5'-CACATTGGGGGTAGGAACAC-3'   | 5'-AACTTTGGCATTGTGGAAGG -3'   |
